# Supplementary material for: A voltammetric sensor based on a carbon black and chitosan-stabilized gold nanoparticle nanocomposite for ketoconazole determination
Source: Royal Society of Chemistry journal article supplement (doi:10.1039/d1ay01321a), 2021-01-01
Supplement: d1ay01321a1.pdf [file d1ay01321a1.pdf]

## Electronic Supplementary Information

### **Voltammetric Sensor Based on Carbon Black and Chitosan-Stabilized Gold Nanoparticles Nanocomposite for Ketoconazole Determination**

Laís Pereira Silva<sup>a</sup>, Tiago Almeida Silva<sup>b</sup>, Fernando Cruz Moraes<sup>a</sup> and Orlando

Fatibello-Filho<sup>a\*</sup>

*<sup>a</sup>Department of Chemistry, Federal University of São Carlos, 13560-970, São Carlos,  
São Paulo, Brazil.*

*<sup>b</sup>Department of Chemistry, Federal University of Viçosa, 36570-900, Minas Gerais,  
Brazil.*

\* Corresponding author.

Tel.: +55 16 33518098; Fax: +55 16 33518350

E-mail address: [bello@ufscar.br](mailto:bello@ufscar.br) (O. Fatibello-Filho)

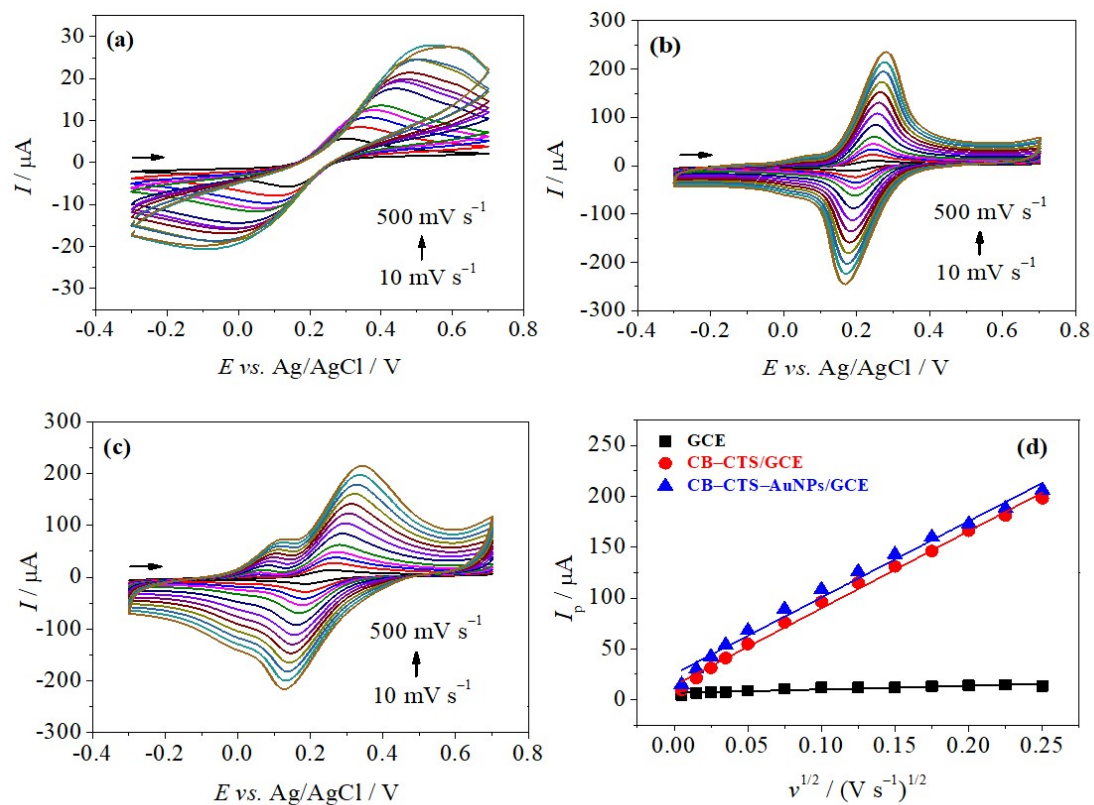

**Fig. S1.** Cyclic voltammograms recorded at different potential scan rates (10 – 500  $\text{mV s}^{-1}$ ) for GCE **(a)**, CB-CTS/GCE **(b)** and CB-CTS-AuNPs/GCE **(c)** using  $1.0 \times 10^{-3} \text{ mol L}^{-1} [\text{Fe}(\text{CN})_6]^{4-/3-}$  in  $0.1 \text{ mol L}^{-1} \text{ KCl}$  supporting electrolyte. **(d)** Plots of  $I_p$  vs.  $v^{1/2}$  for anodic peak currents ( $I_a$ ) for GCE, CB-CTS/GCE and CB-CTS-AuNPs/GCE.

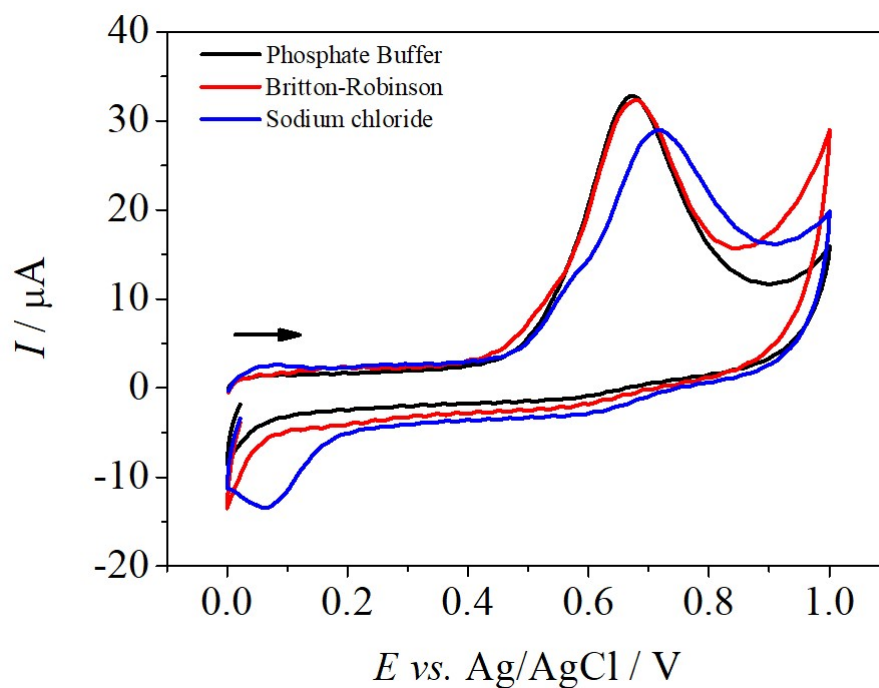

**Fig. S2.** Cyclic voltammograms for  $1.0 \times 10^{-4} \text{ mol L}^{-1}$  KTO in  $0.2 \text{ mol L}^{-1}$  phosphate buffer, pH 9.0 (—),  $0.04 \text{ mol L}^{-1}$  Britton-Robinson, pH 9.0 (—) and  $0.1 \text{ mol L}^{-1}$  sodium chloride, pH 9.0 adjusted with a  $0.1 \text{ mol L}^{-1}$  NaOH solution (—) supporting electrolyte solutions.  $\nu = 50 \text{ mV s}^{-1}$ .

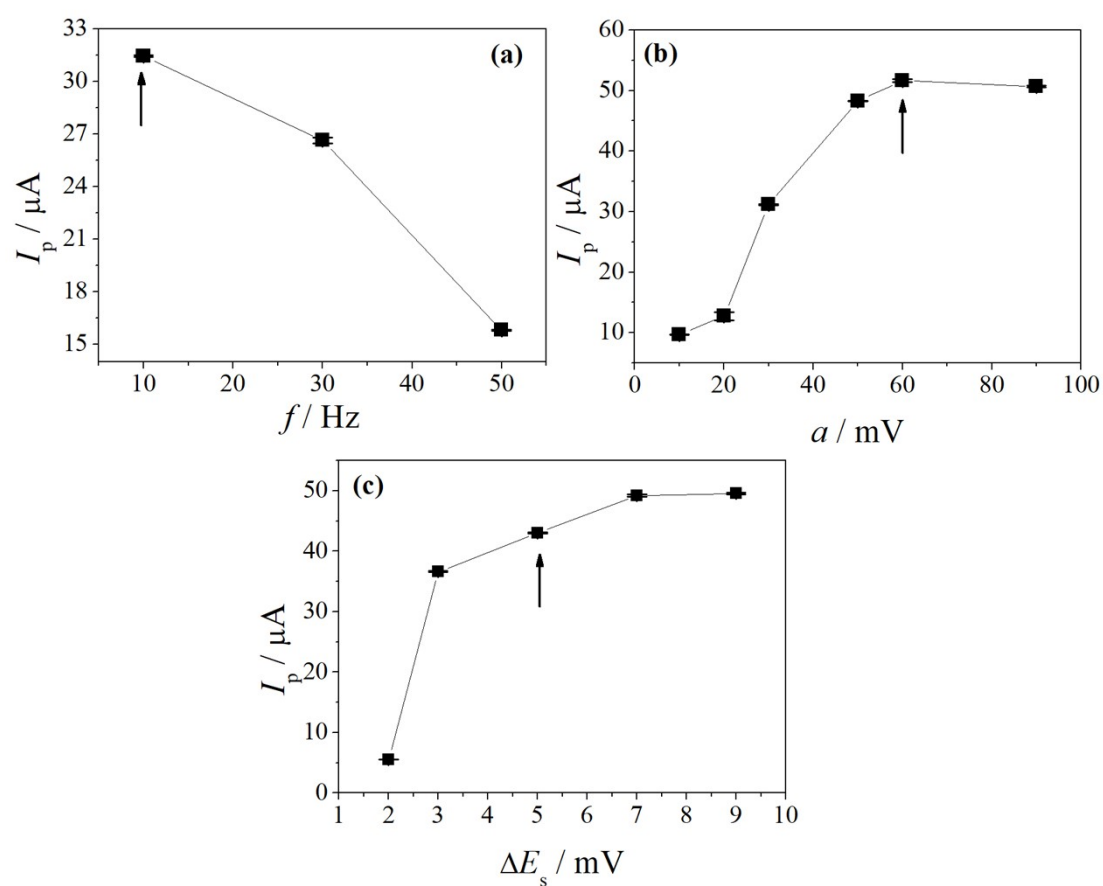

**Fig. S3.** Optimization of KTO anodic response ( $I_p$ ) by square-wave voltammetry using CB-CTS-AuNPs/GCE for different parameters: frequency ( $f$ ), plot of  $I_p$  vs.  $f$  **(a)**, amplitude ( $a$ ), plot of  $I_p$  vs.  $a$  **(b)**, and potential increment ( $\Delta E_s$ ), plot of  $I_p$  vs.  $\Delta E_s$  **(c)**.
